# Supplementary material for: Gamma oryzanol impairs alcohol-induced anxiety-like behavior in mice via upregulation of central monoamines associated with Bdnf and Il-1β signaling
Source: PubMed Central journal article supplement (PMC7326911; doi:10.1038/s41598-020-67689-w), 2020-06-30
Supplement: 41598_2020_67689_MOESM1_ESM.pdf [file 41598_2020_67689_MOESM1_ESM.pdf]

**Gamma oryzanol impairs alcohol-induced anxiety-like behavior in mice via upregulation of central monoamines associated with *Bdnf* and *Il-1 $\beta$*  signaling**

**Author name and Affiliation**

Salina Akter, Kazi Rasel Uddin, Hiroyuki Sasaki, Yijin Lyu, Shigenobu Shibata

Laboratory of Physiology and Pharmacology, School of Advanced Science and Engineering, Waseda University, Tokyo, Japan.

## Supplemental Table S1 Summary results of statistical analysis

| Figure | Test                    | Detail                                     | Parametric<br>Non-parametric | Analysis                                          | Factor                        | F value                                                          | P value                    |
|--------|-------------------------|--------------------------------------------|------------------------------|---------------------------------------------------|-------------------------------|------------------------------------------------------------------|----------------------------|
| 1 (A)  | Body weight             | W0 body weight (g)                         | Non-parametric               | Kruskal-Wallis                                    | -                             | -                                                                | 0.1898                     |
| 1 (A)  | Body weight             | W1 body weight (g)                         | Parametric                   | ANOVA<br>Factor1<br>Factor2<br>Interaction factor | Food<br>Drink<br>Food × Drink | F (1, 41) = 3.845<br>F (1, 41) = 0.3748<br>F (1, 41) = 0.1094    | 0.1848<br>0.6759<br>0.8212 |
| 1 (A)  | Body weight             | W2 body weight (g)                         | Parametric                   | ANOVA<br>Factor1<br>Factor2<br>Interaction factor | Food<br>Drink<br>Food × Drink | F (1, 41) = 9.997<br>F (1, 41) = 6.337<br>F (1, 41) = 0.1994     | 0.1486<br>0.2479<br>0.8363 |
| 1 (A)  | Body weight             | W3 body weight (g)                         | Parametric                   | ANOVA<br>Factor1<br>Factor2<br>Interaction factor | Food<br>Drink<br>Food × Drink | F (1, 41) = 0.002959<br>F (1, 41) = 0.02172<br>F (1, 41) = 0.626 | 0.9859<br>0.9619<br>0.7975 |
| 1 (A)  | Body weight             | W4 body weight (g)                         | Parametric                   | ANOVA<br>Factor1<br>Factor2<br>Interaction factor | Food<br>Drink<br>Food × Drink | F (1, 41) = 0.06366<br>F (1, 41) = 0.01126<br>F (1, 41) = 1.559  | 0.9472<br>0.9778<br>0.7432 |
| 1 (C)  | Food intake             | Food intake for 2 weeks (g)                | Parametric                   | ANOVA<br>Factor1<br>Factor2<br>Interaction factor | Food<br>Drink<br>Food × Drink | F (1, 13) = 0.003252<br>F (1, 13) = 1.801<br>F (1, 13) = 0.09367 | 0.8597<br>0.2025<br>0.7644 |
| 1 (E)  | Drink intake            | Drink intake for 2 weeks (g)               | Non-parametric               | Kruskal-Wallis                                    | -                             | -                                                                | 0.5011                     |
| 2 (A)  | Elevated plus maze test | Distance travelled in the open arm (m)     | Non-parametric               | Kruskal-Wallis                                    | -                             | -                                                                | 0.0012                     |
| 2 (B)  | Elevated plus maze test | Time in the open arm (s)                   | Parametric                   | ANOVA<br>Factor1<br>Factor2<br>Interaction factor | Food<br>Drink<br>Food × Drink | F (1, 41) = 4760<br>F (1, 41) = 806.2<br>F (1, 41) = 10585       | 0.0106<br>0.2770<br>0.0003 |
| 2 (C)  | Elevated plus maze test | No. of entries into the open arm           | Parametric                   | ANOVA<br>Factor1<br>Factor2<br>Interaction factor | Food<br>Drink<br>Food × Drink | F (1, 41) = 127.2<br>F (1, 41) = 13.28<br>F (1, 41) = 117.7      | 0.0567<br>0.5300<br>0.0664 |
| 2 (D)  | Elevated plus maze test | Distance travelled in the closed arm (m)   | Parametric                   | ANOVA<br>Factor1<br>Factor2<br>Interaction factor | Food<br>Drink<br>Food × Drink | F (1, 41) = 0.8924<br>F (1, 41) = 0.001496<br>F (1, 41) = 0.7428 | 0.3672<br>0.9704<br>0.4103 |
| 2 (E)  | Elevated plus maze test | Time in the closed arm (s)                 | Parametric                   | ANOVA<br>Factor1<br>Factor2<br>Interaction factor | Food<br>Drink<br>Food × Drink | F (1, 41) = 6047<br>F (1, 41) = 1079<br>F (1, 41) = 7886         | 0.0450<br>0.3873<br>0.0230 |
| 2 (F)  | Elevated plus maze test | No. of entries into the closed arm         | Non-parametric               | Kruskal-Wallis                                    | -                             | -                                                                | 0.4439                     |
| 3 (A)  | HPLC                    | 5-HT in hippocampus                        | Non-parametric               | Kruskal-Wallis                                    | -                             | -                                                                | 0.0125                     |
| 3 (B)  | HPLC                    | 5-HIAA in hippocampus                      | Non-parametric               | Kruskal-Wallis                                    | -                             | -                                                                | 0.0002                     |
| 3 (C)  | HPLC                    | HVA in hippocampus                         | Non-parametric               | Kruskal-Wallis                                    | -                             | -                                                                | 0.1429                     |
| 3 (D)  | HPLC                    | NE in hippocampus                          | Non-parametric               | Kruskal-Wallis                                    | -                             | -                                                                | 0.5048                     |
| 3 (E)  | HPLC                    | MHPG in hippocampus                        | Non-parametric               | Kruskal-Wallis                                    | -                             | -                                                                | 0.0027                     |
| 3 (F)  | HPLC                    | 5-HT in cerebral cortex                    | Parametric                   | ANOVA<br>Factor1<br>Factor2<br>Interaction factor | Food<br>Drink<br>Food × Drink | F (1, 49) = 0.5519<br>F (1, 49) = 0.3085<br>F (1, 49) = 0.4373   | 0.4611<br>0.5811<br>0.5115 |
| 3 (G)  | HPLC                    | 5-HIAA in cerebral cortex                  | Non-parametric               | Kruskal-Wallis                                    | -                             | -                                                                | 0.0087                     |
| 3 (H)  | HPLC                    | HVA in cerebral cortex                     | Non-parametric               | Kruskal-Wallis                                    | -                             | -                                                                | 0.0061                     |
| 3 (I)  | HPLC                    | NE in cerebral cortex                      | Non-parametric               | Kruskal-Wallis                                    | -                             | -                                                                | 0.5423                     |
| 3 (J)  | HPLC                    | MHPG in cerebral cortex                    | Non-parametric               | Kruskal-Wallis                                    | -                             | -                                                                | 0.0223                     |
| 4 (A)  | RT-PCR                  | <i>Bdnf</i> expression in hippocampus      | Non-parametric               | Kruskal-Wallis                                    | -                             | -                                                                | 0.0118                     |
| 4 (B)  | RT-PCR                  | <i>Il1-β</i> expression in hippocampus     | Parametric                   | ANOVA<br>Factor1<br>Factor2<br>Interaction factor | Food<br>Drink<br>Food × Drink | F (1,37) = 6.438<br>F (1,37) = 0.2536<br>F (1,37) = 4.723        | 0.0155<br>0.6175<br>0.0362 |
| 4 (C)  | RT-PCR                  | <i>Bdnf</i> expression in cerebral cortex  | Non-parametric               | Kruskal-Wallis                                    | -                             | -                                                                | 0.0805                     |
| 4 (D)  | RT-PCR                  | <i>Il1-β</i> expression in cerebral cortex | Non-Parametric               | Kruskal-Wallis                                    | -                             | -                                                                | 0.2073                     |
| 5 (A)  | ELISA                   | BDNF concentration in serum                | Non-parametric               | Kruskal-Wallis                                    | -                             | -                                                                | 0.4873                     |
| 5 (B)  | ELISA                   | IL1-β concentration in serum               | Parametric                   | ANOVA<br>Factor1<br>Factor2<br>Interaction factor | Food<br>Drink<br>Food × Drink | F (1,21) = 0.1322<br>F (1,21) = 0.823<br>F (1,21) = 0.758        | 0.6697<br>0.2926<br>0.3119 |

**Supplemental Table S2** Primer sequence for reverse transcription polymerase chain reaction

| <b>Gene</b>  |         | <b>Sequences</b>            |
|--------------|---------|-----------------------------|
| <i>Bdnf</i>  | Forward | 5'-gcggcagataaaaaga-3'      |
|              | Reverse | 5'-tcagttggcctttgga-3'      |
| <i>IL1-β</i> | Forward | 5'-tccatgagctttgtacaagg -3' |
|              | Reverse | 5'-ggtgctgatgtaccagttgg -3' |
| <i>Gapdh</i> | Forward | 5'-tggtgaaggtcgggtgaac-3'   |
|              | Reverse | 5'-aatgaaggggtcgttgatgg-3'  |

# Supplementary Fig. 1 Experiment Design

5 W old ICR male mice  
(n = 10-12)

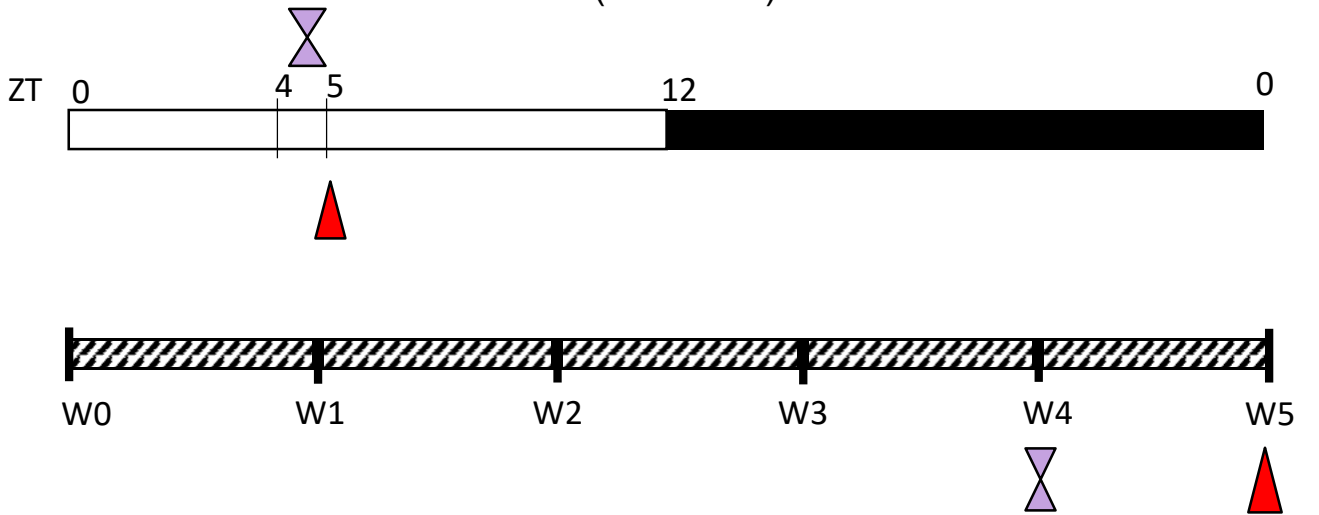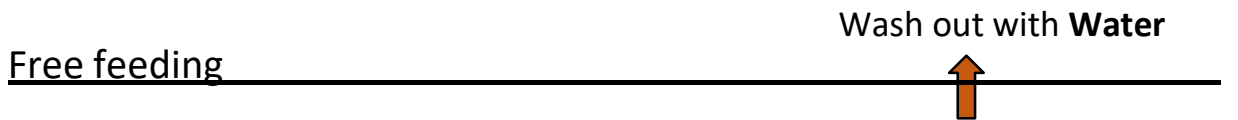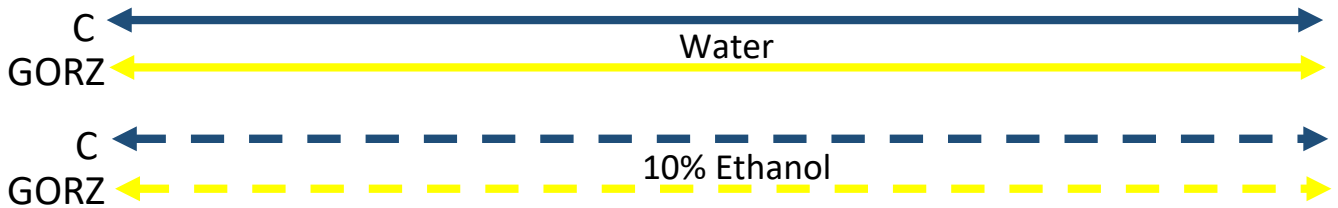

**C** (Control, 14% casein, AIN 93 M)  
**GORZ** ( $\gamma$ -Oryzanol, 14% casein, AIN 93 M + 0.5% GORZ)  
**W** (Week)  
**ZT** (Zeitgeber time)

**Sample:** Blood, Hippocampus, cerebral cortex

 Elevated plus maze test  Sampling
